# Supplementary material
Source: publisher figshare collection journal article supplement (https://diabetesjournals.figshare.com/ndownloader/files/27425525)

# **Projecting the Incidence of Type 2 Diabetes-Related End-Stage Kidney Disease until 2040: A Comparison between the Effects of Diabetes Prevention and Treatment**

Jedidiah I Morton, BSc(Hons), Stephen P McDonald, PhD, Agus Salim, PhD, Danny Liew, PhD, Jonathan E Shaw, MD,<sup>†</sup> & Dianna J Magliano, PhD,<sup>†</sup>.

<sup>†</sup>Co- senior authors.

## **Supplementary Appendix**

### **Contents**

Supplementary Text 1 – Description of data sources for model inputs and uncertainty in model parameters

Supplementary Text 2 – Estimation of sex, age and duration-specific ESKD incidence and all-cause mortality rates

Supplementary Text 3 – Detailed description of the model used to predict the lifetime risk of ESKD

Supplementary Text 4 – Detailed description of the model used to project the incidence of ESKD-D

Supplementary Text 5 – Assumptions for modelling ESKD incidence reductions with SGLT2i use

Supplementary Table 1 – Population Characteristics.

Supplementary Table 2 – Remaining lifetime risk of ESKD, to age 85 years, by age of onset of diabetes and sex.

Supplementary Table 3 – Number of incident diabetes cases expected and reduced by interventions between 2020 and 2040 under various modelled scenarios.

Supplementary Figure 1 – Number of annual incident diabetes-related end-stage kidney disease (ESKD-D) cases among people with type 2 diabetes in Australia, by current trajectory and different interventions.

### Supplementary Text 1 – Description of data sources for model inputs and uncertainty in model parameters.

To estimate the ESKD incidence and all-cause mortality rates used for estimation of the lifetime risk of ESKD and projections of the incidence of ESKD-D, we used data derived from linkage of the National Diabetes Services Scheme (NDSS) to the Australia and New Zealand Dialysis and Transplant Registry (ANZDATA) and the Australian National Death Index (NDI) for 2002-2013, as previously described (1). Briefly, the NDSS was established by the Australian government in 1987 and includes 80-90% of people with diagnosed diabetes in Australia. For model data inputs, we used data from members with type 2 diabetes registered on the NDSS as of 1 January 2002 and all new registrants from this date until 31 December 2013. ANZDATA is a registry that collects data on all people who undergo kidney transplantation and/or dialysis, with complete coverage of all RRT units in Australia. ESKD was defined from ANZDATA as initiation of RRT. The NDI contains records of all registered deaths in Australia.

In the table below the values and sources of all model inputs are outlined, as well as assumed uncertainty distributions used in Monte Carlo simulations.

Table – Source of model inputs and uncertainty. Error distributions were assumed to be normal unless otherwise stated.

| Input                                                     | Estimated value and standard error                                                                                                              | Source                                                                                                                                                                                         |
|-----------------------------------------------------------|-------------------------------------------------------------------------------------------------------------------------------------------------|------------------------------------------------------------------------------------------------------------------------------------------------------------------------------------------------|
| ESKD incidence rate in type 2 diabetes                    | Sex, age, and duration of diabetes-specific transition probability and standard error. Estimated via Poisson regression (Supplementary Text 2). | National Diabetes Services Scheme linked to the Australia and New Zealand Dialysis and Transplant Registry containing data from 2002-2013.                                                     |
| Mortality rate in type 2 diabetes                         | Sex, age, and duration of diabetes-specific transition probability and standard error. Estimated via Poisson regression (Supplementary Text 2). | National Diabetes Services Scheme linked to the Australian National Death Index containing data from 2002-2013.                                                                                |
| Incidence of type 2 diabetes in the Australian population | 2.5 per 1000 Australian population. The standard deviation was assumed to be 10% of the point estimate ( $\pm 0.25$ per 1000).                  | 2.5 per 1000 population was the average incidence of type 2 diabetes from 2015-2019 in Australia. For this calculation the numerator was taken from the National Diabetes Services Scheme data |

|                                                                    |                                                                                                                                                                                                                                                                                                                                                                                                                                                                                                                                                                                                                                                                                                                     | snapshots (2), the denominator was taken from the ABS population estimates (3).                                                                                                                                        |       |         |                 |  |  |     |                 |                |       |                 |                |     |                |                |                    |  |  |     |                  |                  |       |                  |                  |     |                 |                |                                                                                                                                                                                                                                                                                                                                                                                                                                                                                                                                                                                                                                                                                                                            |
|--------------------------------------------------------------------|---------------------------------------------------------------------------------------------------------------------------------------------------------------------------------------------------------------------------------------------------------------------------------------------------------------------------------------------------------------------------------------------------------------------------------------------------------------------------------------------------------------------------------------------------------------------------------------------------------------------------------------------------------------------------------------------------------------------|------------------------------------------------------------------------------------------------------------------------------------------------------------------------------------------------------------------------|-------|---------|-----------------|--|--|-----|-----------------|----------------|-------|-----------------|----------------|-----|----------------|----------------|--------------------|--|--|-----|------------------|------------------|-------|------------------|------------------|-----|-----------------|----------------|----------------------------------------------------------------------------------------------------------------------------------------------------------------------------------------------------------------------------------------------------------------------------------------------------------------------------------------------------------------------------------------------------------------------------------------------------------------------------------------------------------------------------------------------------------------------------------------------------------------------------------------------------------------------------------------------------------------------------|
| Future Australian population size                                  | Actual population estimates were used for 2014-2019. Yearly population projections were used for 2020-2040. The standard error was assumed to be 5% of the point estimate for 2014-2029, and 10% for 2030-2040.                                                                                                                                                                                                                                                                                                                                                                                                                                                                                                     | Actual population estimates came from the Australian Bureau of Statistics population estimates (3). Projected population estimates came from the Australian Bureau of Statistics population projections, series B (4). |       |         |                 |  |  |     |                 |                |       |                 |                |     |                |                |                    |  |  |     |                  |                  |       |                  |                  |     |                 |                |                                                                                                                                                                                                                                                                                                                                                                                                                                                                                                                                                                                                                                                                                                                            |
| Diabetes incidence reduction with a sugar sweetened beverage tax   | <p>Per cent reduction in diabetes incidence (95% CI) among the Australian population:</p> <table> <tr> <th>Age</th><th>Males</th><th>Females</th></tr> <tr> <td colspan="3">Likely scenario</td></tr> <tr> <td>&lt;18</td><td>7.9% (2.8-13.8)</td><td>5.4% (1.9-9.4)</td></tr> <tr> <td>19-64</td><td>6.8% (2.4-11.8)</td><td>4.7% (1.7-8.2)</td></tr> <tr> <td>≥65</td><td>2.7% (1.0-4.8)</td><td>2.5% (0.9-4.4)</td></tr> <tr> <td colspan="3">Best-case scenario</td></tr> <tr> <td>&lt;18</td><td>16.8% (6.2-29.1)</td><td>11.5% (4.2-19.9)</td></tr> <tr> <td>19-64</td><td>14.4% (5.2-24.9)</td><td>10.0% (3.6-17.3)</td></tr> <tr> <td>≥65</td><td>5.8% (2.1-10.0)</td><td>5.4% (2.0-9.3)</td></tr> </table> | Age                                                                                                                                                                                                                    | Males | Females | Likely scenario |  |  | <18 | 7.9% (2.8-13.8) | 5.4% (1.9-9.4) | 19-64 | 6.8% (2.4-11.8) | 4.7% (1.7-8.2) | ≥65 | 2.7% (1.0-4.8) | 2.5% (0.9-4.4) | Best-case scenario |  |  | <18 | 16.8% (6.2-29.1) | 11.5% (4.2-19.9) | 19-64 | 14.4% (5.2-24.9) | 10.0% (3.6-17.3) | ≥65 | 5.8% (2.1-10.0) | 5.4% (2.0-9.3) | <p>To estimate the proportional reduction in diabetes incidence for each age group, we compared the number of diabetes cases prevented in a modelling study by Briggs et al. (5) to the actual incidence of diabetes in the UK used in that study (6). For the best-case scenario, age-specific estimates for diabetes prevention were not publicly available, so we assumed that the age and sex-distribution of the effect was maintained proportionally to the likely scenario, which was true for all other interventions modelled in that study.</p> <p>Similarly, the published uncertainty intervals by age were not publicly available, and so were assumed to be distributed proportionally among age groups.</p> |
| Age                                                                | Males                                                                                                                                                                                                                                                                                                                                                                                                                                                                                                                                                                                                                                                                                                               | Females                                                                                                                                                                                                                |       |         |                 |  |  |     |                 |                |       |                 |                |     |                |                |                    |  |  |     |                  |                  |       |                  |                  |     |                 |                |                                                                                                                                                                                                                                                                                                                                                                                                                                                                                                                                                                                                                                                                                                                            |
| Likely scenario                                                    |                                                                                                                                                                                                                                                                                                                                                                                                                                                                                                                                                                                                                                                                                                                     |                                                                                                                                                                                                                        |       |         |                 |  |  |     |                 |                |       |                 |                |     |                |                |                    |  |  |     |                  |                  |       |                  |                  |     |                 |                |                                                                                                                                                                                                                                                                                                                                                                                                                                                                                                                                                                                                                                                                                                                            |
| <18                                                                | 7.9% (2.8-13.8)                                                                                                                                                                                                                                                                                                                                                                                                                                                                                                                                                                                                                                                                                                     | 5.4% (1.9-9.4)                                                                                                                                                                                                         |       |         |                 |  |  |     |                 |                |       |                 |                |     |                |                |                    |  |  |     |                  |                  |       |                  |                  |     |                 |                |                                                                                                                                                                                                                                                                                                                                                                                                                                                                                                                                                                                                                                                                                                                            |
| 19-64                                                              | 6.8% (2.4-11.8)                                                                                                                                                                                                                                                                                                                                                                                                                                                                                                                                                                                                                                                                                                     | 4.7% (1.7-8.2)                                                                                                                                                                                                         |       |         |                 |  |  |     |                 |                |       |                 |                |     |                |                |                    |  |  |     |                  |                  |       |                  |                  |     |                 |                |                                                                                                                                                                                                                                                                                                                                                                                                                                                                                                                                                                                                                                                                                                                            |
| ≥65                                                                | 2.7% (1.0-4.8)                                                                                                                                                                                                                                                                                                                                                                                                                                                                                                                                                                                                                                                                                                      | 2.5% (0.9-4.4)                                                                                                                                                                                                         |       |         |                 |  |  |     |                 |                |       |                 |                |     |                |                |                    |  |  |     |                  |                  |       |                  |                  |     |                 |                |                                                                                                                                                                                                                                                                                                                                                                                                                                                                                                                                                                                                                                                                                                                            |
| Best-case scenario                                                 |                                                                                                                                                                                                                                                                                                                                                                                                                                                                                                                                                                                                                                                                                                                     |                                                                                                                                                                                                                        |       |         |                 |  |  |     |                 |                |       |                 |                |     |                |                |                    |  |  |     |                  |                  |       |                  |                  |     |                 |                |                                                                                                                                                                                                                                                                                                                                                                                                                                                                                                                                                                                                                                                                                                                            |
| <18                                                                | 16.8% (6.2-29.1)                                                                                                                                                                                                                                                                                                                                                                                                                                                                                                                                                                                                                                                                                                    | 11.5% (4.2-19.9)                                                                                                                                                                                                       |       |         |                 |  |  |     |                 |                |       |                 |                |     |                |                |                    |  |  |     |                  |                  |       |                  |                  |     |                 |                |                                                                                                                                                                                                                                                                                                                                                                                                                                                                                                                                                                                                                                                                                                                            |
| 19-64                                                              | 14.4% (5.2-24.9)                                                                                                                                                                                                                                                                                                                                                                                                                                                                                                                                                                                                                                                                                                    | 10.0% (3.6-17.3)                                                                                                                                                                                                       |       |         |                 |  |  |     |                 |                |       |                 |                |     |                |                |                    |  |  |     |                  |                  |       |                  |                  |     |                 |                |                                                                                                                                                                                                                                                                                                                                                                                                                                                                                                                                                                                                                                                                                                                            |
| ≥65                                                                | 5.8% (2.1-10.0)                                                                                                                                                                                                                                                                                                                                                                                                                                                                                                                                                                                                                                                                                                     | 5.4% (2.0-9.3)                                                                                                                                                                                                         |       |         |                 |  |  |     |                 |                |       |                 |                |     |                |                |                    |  |  |     |                  |                  |       |                  |                  |     |                 |                |                                                                                                                                                                                                                                                                                                                                                                                                                                                                                                                                                                                                                                                                                                                            |
| Diabetes incidence reduction with a lifestyle modification program | Relative risk of developing type 2 diabetes: 0.71 (95% CI: 0.58-0.88). Applied to 35% of adults with prediabetes under the likely scenario, and 50% of adults under the best-case scenario.                                                                                                                                                                                                                                                                                                                                                                                                                                                                                                                         | A meta-analysis of real-world diabetes prevention trials (7).                                                                                                                                                          |       |         |                 |  |  |     |                 |                |       |                 |                |     |                |                |                    |  |  |     |                  |                  |       |                  |                  |     |                 |                |                                                                                                                                                                                                                                                                                                                                                                                                                                                                                                                                                                                                                                                                                                                            |

|                                                      |                                                                                                                                                                                                                                                                          |                                                   |
|------------------------------------------------------|--------------------------------------------------------------------------------------------------------------------------------------------------------------------------------------------------------------------------------------------------------------------------|---------------------------------------------------|
| ESKD incidence reduction with wide-spread SGLT2i use | Relative risk of developing ESKD: 0.65 (95% CI: 0.53-0.81).<br>Applied to 50% of people with an eGFR >45 ml/min/1.73m <sup>2</sup> by 2023 under the likely scenario, and 70% of people with an eGFR >30 ml/min/1.73m <sup>2</sup> by 2024 under the best-case scenario. | A meta-analysis of phase III clinical trials (8). |
|------------------------------------------------------|--------------------------------------------------------------------------------------------------------------------------------------------------------------------------------------------------------------------------------------------------------------------------|---------------------------------------------------|

## References

1. Morton JI, Liew D, McDonald SP, Shaw JE, Magliano DJ. The Association Between Age of Onset of Type 2 Diabetes and the Long-term Risk of End-Stage Kidney Disease: A National Registry Study. *Diabetes care*. 2020;43(8):1788.
2. National Diabetes Services Scheme. Diabetes data snapshots. Available at: <https://www.ndss.com.au/about-the-ndss/diabetes-facts-and-figures/diabetes-data-snapshots/>. Accessed 14 Oct 2020. .
3. Australian Bureau of Statistics. National, state and territory population. Available at: <https://www.abs.gov.au/statistics/people/population/national-state-and-territory-population>. Accessed 14 Oct 2020.
4. Australian Bureau of Statistics. Population Projections, Australia, 2017 (base) to 2066 (cat. no. 3222.0). Available at: <https://www.abs.gov.au/statistics/people/population/population-projections-australia/2017-base-2066>. Accessed 29 May 2020.
5. Briggs ADM, Mytton OT, Kehlbacher A, Tiffin R, Elhussein A, Rayner M, et al. Health impact assessment of the UK soft drinks industry levy: a comparative risk assessment modelling study. *The Lancet Public Health*. 2017;2(1):e15-e22.
6. Holden SH, Barnett AH, Peters JR, Jenkins-Jones S, Poole CD, Morgan CL, et al. The incidence of type 2 diabetes in the United Kingdom from 1991 to 2010. *Diabetes, obesity & metabolism*. 2013;15(9):844-52.
7. Galaviz KI, Weber MB, Straus A, Haw JS, Narayan KMV, Ali MK. Global Diabetes Prevention Interventions: A Systematic Review and Network Meta-analysis of the Real-World Impact on Incidence, Weight, and Glucose. *Diabetes care*. 2018;41(7):1526-34.
8. Neuen BL, Young T, Heerspink HJL, Neal B, Perkovic V, Billot L, et al. SGLT2 inhibitors for the prevention of kidney failure in patients with type 2 diabetes: a systematic review and meta-analysis. *The lancet Diabetes & endocrinology*. 2019;7(11):845-54.

## **Supplementary Text 2 – Estimation of sex, age and duration-specific ESKD incidence and all-cause mortality rates**

Incidence of ESKD and mortality rates among people without ESKD as a function of sex, age and duration of diabetes were predicted in order to estimate the lifetime risk of ESKD, as well as project the incidence of ESKD, using a framework previously described (1). Briefly, National Diabetes Services Scheme registrants were followed from 1 January 2002 or date of registration, if later, until onset of ESKD, death, or end of follow-up on 31 December 2013. Registrants' follow-up (risk time and ESKD or deaths) was split into intervals of 6 months by current age (0–100 years), calendar time (2002–2013) and diabetes duration (0–40 years). Risk time and ESKD or deaths were then tabulated by current age, date of follow-up, and duration of diabetes, and each cell of the table was assigned age, date, and diabetes duration as continuous variables as the midpoint of the 6 month group. When date of diagnosis was not available for a participant, date of registration was used as a proxy. Data were analysed using a Poisson model, using spline effects of current age, diabetes duration and age at diagnosis, with a linear effect of calendar time. Separate models were fitted for the incidence of ESKD and all-cause mortality among those without ESKD. These models were fitted for males and females separately. Rates are then predicted for each attained age and duration of diabetes, by sex.

### **Reference**

1. Huo L, Magliano DJ, Rancière F, Harding JL, Nanayakkara N, Shaw JE, et al. Impact of age at diagnosis and duration of type 2 diabetes on mortality in Australia 1997–2011. *Diabetologia*. 2018;61(5):1055-63.

### Supplementary Text 3 – Detailed description of the model used to predict the lifetime risk of ESKD among adults with type 2 diabetes

Step 1: The model begins with a cohort at diagnosis of type 2 diabetes. For this example males diagnosed with type 2 diabetes at age 20 are used, but the methods are the same for any cohort followed from diagnosis of type 2 diabetes.

At this stage the dataset looks as follows:

| Sex  | Age | N   |
|------|-----|-----|
| Male | 20  | 100 |

Step 2: transition rates for ESKD are applied, based on the age, age at diagnosis of diabetes, and sex (Supplementary Text 2). Let these rates be denoted by TE, and the number developing ESKD at a given age be denoted N\_ESKD ( $=N*TE$ ). Let the total number who have developed ESKD since diagnosis of type 2 diabetes be denoted C\_I (for cumulative incidence).

| Sex  | Age | N   | TE     | N_ESKD | C_I  |
|------|-----|-----|--------|--------|------|
| Male | 20  | 100 | 0.0001 | 0.01   | 0.01 |

To move forward, N\_ESKD is subtracted from N, to track those who remain without ESKD, which is denoted N\_EF (Number ESKD-free).

| Sex  | Age | N   | TE     | N_ESKD | C_I  | N_EF  |
|------|-----|-----|--------|--------|------|-------|
| Male | 20  | 100 | 0.0001 | 0.01   | 0.01 | 99.99 |

Step 3: transition rates for mortality are applied to people without ESKD. Let these rates be denoted by TM, and the number dying be denoted N\_Death ( $=N\_EF*TM$ ).

| Sex  | Age | N   | TE     | N_ESKD | C_I  | N_EF  | TM    | N_Death |
|------|-----|-----|--------|--------|------|-------|-------|---------|
| Male | 20  | 100 | 0.0001 | 0.01   | 0.01 | 99.99 | 0.002 | 0.2     |

The number of people who remain alive without ESKD at the end of the year is thus  $N_{EF} - N_{Death} = N_{Alive}$ .

| Sex  | Age | N   | TE     | N_ESKD | C_I  | N_EF  | TM    | N_Death | N_Alive |
|------|-----|-----|--------|--------|------|-------|-------|---------|---------|
| Male | 20  | 100 | 0.0001 | 0.01   | 0.01 | 99.99 | 0.002 | 0.2     | 99.79   |

Step 4: The cohort is followed to age 85 years, repeating the process each year. The number entering the next year is the number who were alive without ESKD at the end of the previous year.

| Sex  | Age | N     | TE     | N_ESKD | C_I  | N_EF  | TM    | N_Death | N_Alive |
|------|-----|-------|--------|--------|------|-------|-------|---------|---------|
| Male | 20  | 100   | 0.0001 | 0.01   | 0.01 | 99.99 | 0.002 | 0.2     | 99.79   |
| Male | 21  | 99.79 | 0.0002 | 0.02   | 0.03 | 99.77 | 0.004 | 0.4     | 99.37   |
| Male | 23  | 99.37 | 0.0003 | 0.03   | 0.06 | 99.34 | 0.005 | 0.5     | 98.84   |
| ...  |     |       |        |        |      |       |       |         |         |
| Male | 83  | 11.19 | 0.0055 | 0.06   | 29.4 | 11.13 | 0.161 | 1.8     | 9.33    |
| Male | 84  | 9.33  | 0.0046 | 0.04   | 29.5 |       |       |         |         |

Thus, the lifetime risk of ESKD for males aged 20 at diagnosis of type 2 diabetes is 29.5%.

There is a specific and separate ESKD and mortality transition rate for each age, sex, and age at diagnosis combination, resulting from Poisson regression as outlined in Supplementary Text 2.

In the Monte Carlo simulations, transition probabilities were simulated before being applied.

The model is detailed schematically in the following figure:

Step 1: The model begins with a cohort at diagnosis of type 2 diabetes.

Type 2 diabetes

Step 2: Using age, sex, and duration of diabetes-specific ESKD incidence rates, people are transitioned to ESKD.

Type 2 diabetes

DKD

ESKD

Step 3: Age, sex, and duration of diabetes-specific mortality rates are applied.

Type 2 diabetes

Death

Step 4: Repeat steps 2 and 3 each year of age until age 85 years.

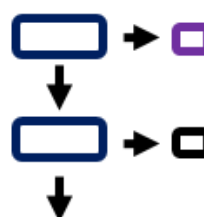



#### Supplementary Text 4 – Detailed description of the model used to project the incidence of ESKD-D

The model begins with the NDSS population as at 1 January 2014, in terms of age, sex, and age at diagnosis of diabetes. At this stage the dataset looks as follows:

| Sex    | Age | Age_at_dx | N  |
|--------|-----|-----------|----|
| Male   | 10  | 10        | 1  |
| Male   | 11  | 10        | 3  |
| Male   | 12  | 10        | 2  |
| ...    |     |           |    |
| Male   | 37  | 29        | 45 |
| Male   | 38  | 29        | 32 |
| ...    |     |           |    |
| Female | 10  | 10        | 2  |
| ...    |     |           |    |
| Female | 103 | 100       | 1  |

Where dx is short for diagnosis. In this dataset, N represents the number of individuals who fit each age/age at diagnosis category. For example, as at 1 January 2014, there were n=45 males aged 37 years who were diagnosed with type 2 diabetes at age 29 years registered on the NDSS. There is an age, sex, and age at diagnosis category for all NDSS registrants alive at 1 January 2014.

Step 1: transition rates for ESKD are applied, based on the age, age at diagnosis of diabetes, and sex (Supplementary Text 2). Let these rates be denoted by TE, and the number developing ESKD be denoted N\_ESKD ( $=N*TE$ ).

| Sex    | Age | Age_at_dx | N  | TE      | N_ESKD  |
|--------|-----|-----------|----|---------|---------|
| Male   | 10  | 10        | 1  | 0.00007 | 0.00007 |
| Male   | 11  | 10        | 3  | 0.00008 | 0.00024 |
| Male   | 12  | 10        | 2  | 0.00009 | 0.00018 |
| ...    |     |           |    |         |         |
| Male   | 37  | 29        | 45 | 0.00062 | 0.02790 |
| Male   | 38  | 29        | 32 | 0.00076 | 0.02432 |
| ...    |     |           |    |         |         |
| Female | 10  | 10        | 2  | 0.00006 | 0.00012 |
| ...    |     |           |    |         |         |
| Female | 103 | 100       | 1  | 0.00000 | 0.00000 |

The total number developing ESKD this year is thus the sum of the variable N\_ESKD over the entire dataset. To move forward, N\_ESKD is subtracted from N, to track those without ESKD only.

| Sex    | Age | Age_at_dx | N       |
|--------|-----|-----------|---------|
| Male   | 10  | 10        | 0.99993 |
| Male   | 11  | 10        | 2.99976 |
| Male   | 12  | 10        | 1.99982 |
| ...    |     |           |         |
| Male   | 37  | 29        | 44.9721 |
| Male   | 38  | 29        | 31.9757 |
| ...    |     |           |         |
| Female | 10  | 10        | 1.99988 |
| ...    |     |           |         |
| Female | 103 | 100       | 1.00000 |

Step 2: transition rates for mortality are applied. Let these rates be denoted by TM, and the number dying be denoted N\_Death ( $=N*TM$ ).

| Sex    | Age | Age_at_dx | N       | TM      | N_Death |
|--------|-----|-----------|---------|---------|---------|
| Male   | 10  | 10        | 0.99993 | 0.00124 | 0.00124 |
| Male   | 11  | 10        | 2.99976 | 0.00117 | 0.00351 |
| Male   | 12  | 10        | 1.99982 | 0.00114 | 0.00228 |
| ...    |     |           |         |         |         |
| Male   | 37  | 29        | 44.9721 | 0.00294 | 0.13222 |
| Male   | 38  | 29        | 31.9757 | 0.00314 | 0.10040 |
| ...    |     |           |         |         |         |
| Female | 10  | 10        | 1.99988 | 0.00021 | 0.00042 |
| ...    |     |           |         |         |         |
| Female | 103 | 100       | 1.00000 | 0.64005 | 0.64005 |

These people are removed from the model by subtracting N\_Death from N.

| Sex    | Age | Age_at_dx | N       |
|--------|-----|-----------|---------|
| Male   | 10  | 10        | 0.99869 |
| Male   | 11  | 10        | 2.99625 |
| Male   | 12  | 10        | 1.99754 |
| ...    |     |           |         |
| Male   | 37  | 29        | 44.8399 |
| Male   | 38  | 29        | 31.8753 |
| ...    |     |           |         |
| Female | 10  | 10        | 1.99946 |
| ...    |     |           |         |
| Female | 103 | 100       | 0.35995 |

Step 3: The population with type 2 diabetes is aged one year.

| Sex    | Age | Age_at_dx | N       |
|--------|-----|-----------|---------|
| Male   | 11  | 10        | 0.99869 |
| Male   | 12  | 10        | 2.99625 |
| Male   | 13  | 10        | 1.99754 |
| ...    |     |           |         |
| Male   | 38  | 29        | 44.8399 |
| Male   | 39  | 29        | 31.8753 |
| ...    |     |           |         |
| Female | 11  | 10        | 1.99946 |
| ...    |     |           |         |
| Female | 104 | 100       | 0.35995 |

A population with incident type 2 diabetes is added.

| Sex    | Age | Age_at_dx | N       |
|--------|-----|-----------|---------|
| Male   | 10  | 10        | 1       |
| Male   | 11  | 10        | 0.99869 |
| Male   | 12  | 10        | 2.99625 |
| Male   | 13  | 10        | 1.99754 |
| ...    |     |           |         |
| Male   | 29  | 29        | 15      |
| ...    |     |           |         |
| Male   | 38  | 29        | 44.8399 |
| Male   | 39  | 29        | 31.8753 |
| ...    |     |           |         |
| Female | 10  | 10        | 1       |
| Female | 11  | 10        | 1.99946 |
| ...    |     |           |         |
| Female | 104 | 100       | 0.35995 |

This process is now repeated for 2015-2040 to obtain estimates for the current trajectory.

There is a specific and separate ESKD and mortality transition rate for each age, sex, and age at diagnosis combination, resulting from Poisson regression as outlined in Supplementary Text 2.

The size of the incident population is given by the product of the ABS population projection estimate for the year in question and 0.0025 (incidence of type 2 diabetes of 2.5 per 1000 Australian population; Supplementary Text 1). For example, in 2022, the size of the Australian population is projected to be 26,727,075, thus the incident population size with type 2 diabetes is  $0.0025 \times 26,727,075 = 66,817.69$ . The age and sex distribution of the incident population is assumed to remain constant from 2014-2040.

When applying diabetes incidence reductions, the size of the incident population is reduced proportionally to the size of the diabetes incidence reduction specified in Supplementary Text 1. For example, a 29% incidence reduction applied to 35% of the

whole population with incident type 2 diabetes in 2022 reduces the number of incident cases from 66,817.69 to 60,035.69 ( $=66,817.69 \times (1 - 0.35 \times 0.29)$ ). (This example is presented for simplicity, in the actual model the incidence reduction applies only to those older than 18 years of age).

When applying ESKD incidence reductions, the ESKD incidence rate is reduced by the amount detailed in Supplementary Text 5. For example, under the best-case scenario in 2030, the incidence of ESKD is reduced by 24.5% ( $=35\% \times 70\%$ ). Thus, if the probability of transition to ESKD for those aged 10 years diagnosed with diabetes at age 10 years was 0.00007 in the current trajectory, it is reduced to 0.00005285 ( $=0.00007 \times (1 - (0.35 \times 0.7))$ ).

In the Monte Carlo simulations, transition probabilities were simulated before being applied. Simulated parameters from the baseline scenario were held constant for each simulation of an intervention, i.e. each simulation compared the intervention with a paired baseline scenario in which the baseline parameters (incident diabetes rate, ESKD incidence rate, mortality rates in people without ESKD, and future population size) were the same for the baseline and intervention simulation.

The model is detailed schematically in the following figure:

Step 1: The model at this point contains everyone with type 2 diabetes on the NDSS in 2014. Using age, sex, and duration of diabetes-specific ESKD incidence rates, people are transitioned to ESKD. Once ESKD has developed, these people are no longer tracked.

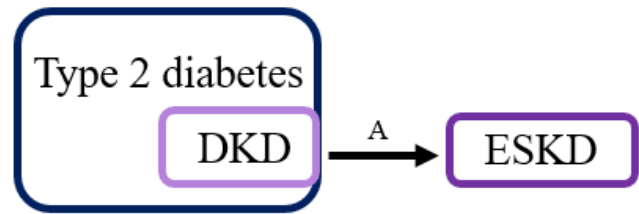

Step 2: Age, sex, and duration of diabetes-specific mortality rates are applied.

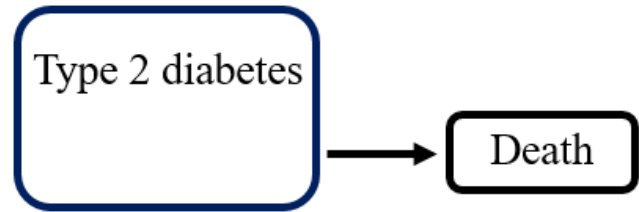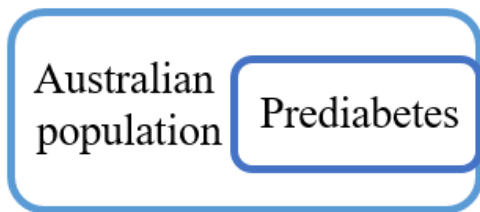

Step 3: A population with incident type 2 diabetes from the Australian population is added to the model. At the same time, The population with type 2 diabetes is aged one year.

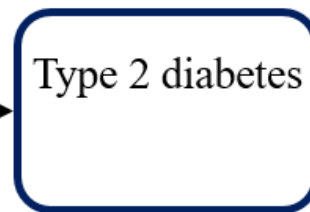

Step 4: Repeat steps 1-3 for 2015-2040.

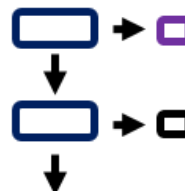

A: In scenarios involving SGLT2i use, SGLT2is act to decrease the rate of transition from type 2 diabetes to ESKD.

B: In scenarios involving diabetes prevention, diabetes prevention acts to decrease the rate of transition from prediabetes to type 2 diabetes.

DKD: Diabetic kidney disease; ESKD – End-stage kidney disease.

## **Supplementary Text 5 – Assumptions for modelling ESKD incidence reductions with SGLT2i use**

The effect of SGLT2is on the incidence of ESKD was estimated from a meta-analysis of phase III clinical trials (1); SGLT2is were found to reduce ESKD by 35% (RR: 0.65; 95% CI: 0.53-0.81). In Australia, SGLT2is are currently not recommended for individuals with an eGFR of  $<45$  ml/min/ $1.73\text{m}^2$ , and because there's usually a delay of many years between reaching an eGFR of  $45\text{ml/min}/1.73\text{m}^2$  and progression to ESKD, the impact of SGLT2i use on ESKD incidence will not be immediate. Therefore, several assumptions about eGFR trajectories prior to initiation of renal replacement therapy (RRT) were made. Similarly, assumptions about how SGLT2i use will increase over time in the population with type 2 diabetes and DKD were made.

The best available evidence for estimation of eGFR trajectory prior to RRT was considered to be O'Hare et al (2). Among those with diabetes, ~90% had a steady progression to RRT from an eGFR of  $<60\text{ml/min}/1.73\text{m}^2$  two years prior to RRT, and ~10% had a sudden progression from an eGFR of  $>60\text{ml/min}/1.73\text{m}^2$ . Of this ~90% with steady decline in renal function prior to RRT, we assumed ~80% will take ~6 years from reaching an eGFR of  $45\text{ml/min}/1.73\text{m}^2$  to reach an eGFR  $<30\text{ml/min}/1.73\text{m}^2$  (estimated from (3)), and thus take approximately ~8 years from reaching an eGFR of  $45\text{ml/min}/1.73\text{m}^2$  until commencing RRT. The remaining ~20% will progress much faster, and will take ~4 years to reach RRT from reaching an eGFR of  $45\text{ml/min}/1.73\text{m}^2$ . It is worth noting that these estimates assume linearity in eGFR decline, and while the majority of eGFR decline is linear, a nontrivial proportion is nonlinear (4).

Therefore, we assumed that 10% of individuals will decline from an eGFR of  $>60\text{ml/min}/1.73\text{m}^2$  to RRT within 2 years, 72% will take 8 years from reaching an eGFR of  $45\text{ml/min}/1.73\text{m}^2$  to RRT, and 18% of individuals will take ~4 years from reaching an eGFR of  $45\text{ml/min}/1.73\text{m}^2$  to RRT. These times are used to calculate the delay between SGLT2i use and the impact of SGLT2is on the incidence of ESKD. For example, if SGLT2is were used in 20% of the population in 2020, we apply a reduction of 13% (20% of the incidence rate reduction of 0.65) to the incidence of ESKD: 10% of this effect will manifest in 2022, 72% in 2028, and 18% in 2024.

We based the likely SGLT2i use in people with type 2 diabetes and CKD on studies of the prevalence of Renin-Angiotensin-Aldosterone System inhibitor (RAASi) use. These studies show that the prevalence of RAASi use in this population varies with study design from ~20-60% (5,6). We assumed that following publication of the Canagliflozin and Renal Outcomes in Type 2 Diabetes and Nephropathy (CREDENCE) trial, which showed clear benefit of these agents for progression of CKD among people with type 2 diabetes and macroalbuminuria (7), use of SGLT2is would reach 50% in this population. Furthermore, use of SGLT2is prior to 2020 in this population would not have been negligible, especially following the publication of several large trials showing benefits of SGLT2is on cardiovascular disease, the first of which was published in 2015 (8).

Therefore, in the likely scenario, we assumed the use of SGLT2is increased to 20% by 2020, and then increased to 50% by 2023, but remained contraindicated for individuals with an eGFR > 45ml/min/1.73m<sup>2</sup>.

Because the CREDENCE trial showed evidence of benefit progression to ESKD in individuals with an eGFR as low as 30ml/min/1.73m<sup>2</sup>, it is reasonable to expect guidelines might change to expand use of SGLT2is to individuals with an eGFR as low as 30ml/min/1.73m<sup>2</sup>. Therefore, in the best-case scenario, we assumed use of SGLT2is increased to 28% in those with an eGFR >45ml/min/1.73m<sup>2</sup> by 2020, increasing to 70% by 2023. Use increased from 0% in 2019 to 70% by 2024 for those with an eGFR 30-45ml/min/1.73m<sup>2</sup>.

Ultimately, when these assumptions are applied, the per cent reduction in incidence of ESKD each year applied is as follows:

| Year      | Likely (%) | Best-case (%) |
|-----------|------------|---------------|
| 2018      | 0.00       | 0.00          |
| 2019      | 0.07       | 0.27          |
| 2020      | 0.34       | 0.58          |
| 2021      | 0.83       | 0.89          |
| 2022      | 1.52       | 5.58          |
| 2023      | 2.43       | 10.40         |
| 2024      | 3.54       | 15.23         |
| 2025      | 4.87       | 20.05         |
| 2026      | 6.41       | 24.50         |
| 2027      | 8.16       | 24.50         |
| 2028      | 10.11      | 24.50         |
| 2029      | 12.28      | 24.50         |
| 2030      | 14.66      | 24.50         |
| 2031-2040 | 17.50      | 24.50         |

## References

1. Neuen BL, Young T, Heerspink HJL, Neal B, Perkovic V, Billot L, et al. SGLT2 inhibitors for the prevention of kidney failure in patients with type 2 diabetes: a systematic review and meta-analysis. *The lancet Diabetes & endocrinology*. 2019;7(11):845-54.
2. O'Hare AM, Batten A, Burrows NR, Pavkov ME, Taylor L, Gupta I, et al. Trajectories of Kidney Function Decline in the 2 Years Before Initiation of Long-term Dialysis. *American Journal of Kidney Diseases*. 2012;59(4):513-22.
3. Xie Y, Bowe B, Xian H, Balasubramanian S, Al-Aly Z. Estimated GFR Trajectories of People Entering CKD Stage 4 and Subsequent Kidney Disease Outcomes and Mortality. *American Journal of Kidney Diseases*. 2016;68(2):219-28.
4. Weldegiorgis M, de Zeeuw D, Li L, Parving H-H, Hou FF, Remuzzi G, et al. Longitudinal Estimated GFR Trajectories in Patients With and Without Type 2 Diabetes and Nephropathy. *American Journal of Kidney Diseases*. 2018;71(1):91-101.
5. Murphy DP, Drawz PE, Foley RN. Trends in Angiotensin-Converting Enzyme Inhibitor and Angiotensin II Receptor Blocker Use among Those with Impaired

Kidney Function in the United States. *Journal of the American Society of Nephrology* : JASN. 2019;30(7):1314-21.

6. Tuttle KR, Alicic RZ, Duru OK, Jones CR, Daratha KB, Nicholas SB, et al. Clinical Characteristics of and Risk Factors for Chronic Kidney Disease Among Adults and Children: An Analysis of the CURE-CKD Registry. *JAMA Network Open*. 2019;2(12):e1918169-e.

7. Perkovic V, Jardine MJ, Neal B, Bompoint S, Heerspink HJL, Charytan DM, et al. Canagliflozin and Renal Outcomes in Type 2 Diabetes and Nephropathy. *New England Journal of Medicine*. 2019;380(24):2295-306.

8. Zinman B, Wanner C, Lachin JM, Fitchett D, Bluhmki E, Hantel S, et al. Empagliflozin, Cardiovascular Outcomes, and Mortality in Type 2 Diabetes. *New England Journal of Medicine*. 2015;373(22):2117-28.



**Supplementary Table 1 – Population Characteristics.**

Characteristics of the population used for derivation of model data. The model used data derived from the National Diabetes Services Scheme linked to the Australia and New Zealand Dialysis and Transplant Registry and the Australian National Death Index. We included members with type 2 diabetes registered on the NDSS as of 1 January 2002 and all new registrants from this date until 31 December 2013.

|                                                         |       | Males          | Females        | Overall          |
|---------------------------------------------------------|-------|----------------|----------------|------------------|
| Total N (%)                                             |       | 636922 (54.2%) | 537641 (45.8%) | 1174563 (100.0%) |
| Incident ESKD (N)                                       |       | 4902           | 2773           | 7675             |
| Deaths without ESKD (N)                                 |       | 127614         | 98321          | 225935           |
| Person-years of follow-up                               |       | 4233208        | 3838415        | 8071623          |
| Age of onset of diabetes – N (%)                        | 10-39 | 47583 (7.5%)   | 66327 (12.3%)  | 113910 (9.7%)    |
|                                                         | 40-54 | 200249 (31.4%) | 140146 (26.1%) | 340395 (29.0%)   |
|                                                         | 55-69 | 268745 (42.2%) | 207370 (38.6%) | 476115 (40.5%)   |
|                                                         | ≥70   | 120345 (18.9%) | 123798 (23.0%) | 244143 (20.8%)   |
| Duration of diabetes at end of follow-up – median (IQR) |       | 7.9 (3.7-13.7) | 8.9 (4.2-14.8) | 8.3 (3.9-14.2)   |

**Supplementary Table 2 – Remaining lifetime risk of ESKD, to age 85 years, by age of onset of diabetes and sex.**

Estimated using multistate life table modelling.

Data are presented as median (95% uncertainty interval).

| Age of onset of diabetes | Males             | Females           |
|--------------------------|-------------------|-------------------|
| 20                       | 29.5% (23.1-37.9) | 17.7% (11.6-25.3) |
| 30                       | 17.7% (14.9-21.4) | 12.5% (9.5-16.1)  |
| 40                       | 9.0% (8.0-10.2)   | 8.4% (7.1-10.0)   |
| 50                       | 4.7% (4.2-5.2)    | 4.4% (3.9-5.2)    |
| 60                       | 2.5% (2.3-2.8)    | 1.8% (1.6-2.1)    |
| 70                       | 1.2% (1.1-1.4)    | 0.7% (0.6-0.8)    |
| 80                       | 0.3% (0.3-0.4)    | 0.1% (0.1-0.2)    |

**Supplementary Table 3 – Number of incident diabetes cases expected and reduced by interventions between 2020 and 2040 under various modelled scenarios.**

Data are presented as number of expected cases for current trajectory, and number of cases reduced (%) for each scenario.

| Age                             | Number of cases expected    | Number of cases reduced (%)    |                                 |                               |                                 |                                  |                                  |
|---------------------------------|-----------------------------|--------------------------------|---------------------------------|-------------------------------|---------------------------------|----------------------------------|----------------------------------|
|                                 | Current Trajectory          | Lifestyle modification program |                                 | Sugar sweetened beverage tax  |                                 | Combination of all interventions |                                  |
|                                 |                             | Likely                         | Best-case                       | Likely                        | Best-case                       | Likely                           | Best-case                        |
| Males                           |                             | Males                          |                                 |                               |                                 |                                  |                                  |
| 10-39                           | 61000                       | 5883 (9.6%)                    | 8412 (13.8%)                    | 4106 (6.7%)                   | 8736 (14.3%)                    | 9516 (15.6%)                     | 15840 (26.0%)                    |
| 40-54                           | 248230                      | 24565 (9.9%)                   | 35127 (14.2%)                   | 16635 (6.7%)                  | 35399 (14.3%)                   | 39257 (15.8%)                    | 65097 (26.2%)                    |
| 55-69                           | 352664                      | 34900 (9.9%)                   | 49905 (14.2%)                   | 19415 (5.5%)                  | 41320 (11.7%)                   | 52001 (14.7%)                    | 84643 (24.0%)                    |
| 70-84                           | 160607                      | 15894 (9.9%)                   | 22727 (14.2%)                   | 4212 (2.6%)                   | 8992 (5.6%)                     | 19727 (12.3%)                    | 30438 (19.0%)                    |
| Total; 95% uncertainty interval | 822501; 641981 to 1035481   | 81241 (9.9%); 31270 to 131046  | 116171 (14.1%); 44687 to 187478 | 44376 (5.4%); 10514 to 76630  | 94441 (11.5%); 20760 to 162054  | 120373 (14.6%); 63421 to 183419  | 195473 (23.8%); 103337 to 298096 |
| Females                         |                             | Females                        |                                 |                               |                                 |                                  |                                  |
| 10-39                           | 60009                       | 5759 (9.6%)                    | 8234 (13.7%)                    | 2808 (4.7%)                   | 5975 (10.0%)                    | 8241 (13.7%)                     | 13297 (22.2%)                    |
| 40-54                           | 167909                      | 16640 (9.9%)                   | 23793 (14.2%)                   | 7821 (4.7%)                   | 16639 (9.9%)                    | 23552 (14.0%)                    | 37753 (22.5%)                    |
| 55-69                           | 257425                      | 25511 (9.9%)                   | 36478 (14.2%)                   | 10230 (4.0%)                  | 21819 (8.5%)                    | 34691 (13.5%)                    | 54815 (21.3%)                    |
| 70-84                           | 149015                      | 14767 (9.9%)                   | 21116 (14.2%)                   | 3638 (2.4%)                   | 7862 (5.3%)                     | 18115 (12.2%)                    | 27843 (18.7%)                    |
| Total; 95% uncertainty interval | 634358; 494942 to 798935    | 62676 (9.9%); 24125 to 101188  | 89621 (14.1%); 34475 to 144747  | 24506 (3.9%); 5916 to 42413   | 52293 (8.2%); 12503 to 89897    | 84701 (13.4%); 42760 to 128962   | 133637 (21.1%); 71372 to 201863  |
| Overall                         |                             | Overall                        |                                 |                               |                                 |                                  |                                  |
| Total; 95% uncertainty interval | 1456859; 1136923 to 1834415 | 143927 (9.9%); 55395 to 232234 | 205803 (14.1%); 79161 to 332225 | 68882 (4.7%); 16430 to 119043 | 146686 (10.1%); 33393 to 251947 | 204824 (14.1%); 106004 to 312035 | 328911 (22.6%); 175026 to 498479 |

**Supplementary Figure 1 – Number of annual incident diabetes-related end-stage kidney disease (ESKD-D) cases among people with type 2 diabetes in Australia, by current trajectory and different interventions.**

**A** – Likely scenarios. **B** – Best-case scenarios.

Abbreviations: LSM – Lifestyle modification; SSB – Sugar Sweetened Beverage; SGLT2i – Sodium-glucose co-transporter 2 inhibitor.

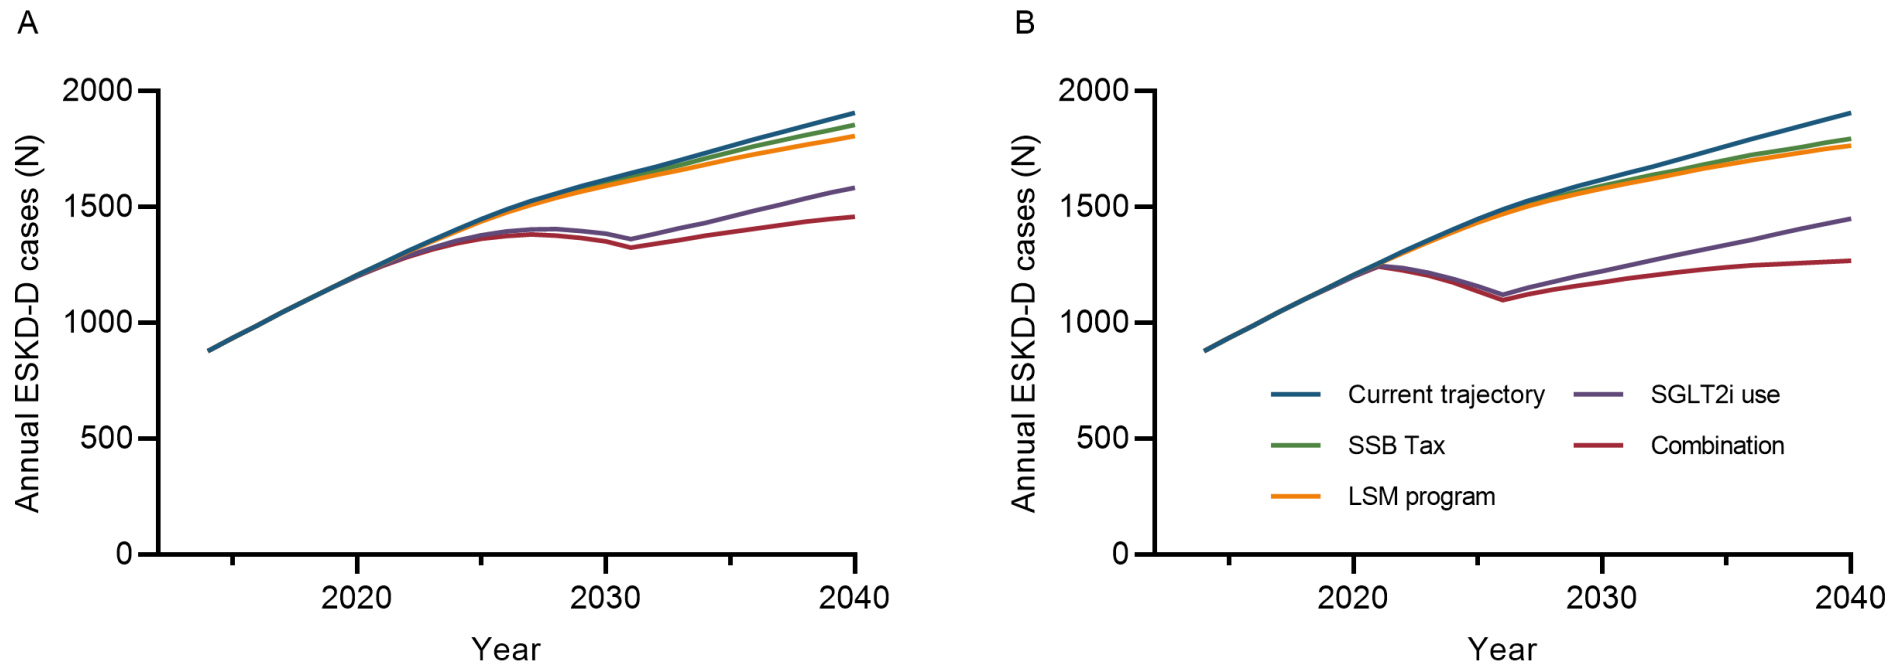

Supplement: Supplementary file 1 [file 27425525]
